# Supplementary material for: Radioprotective effects and mechanism of HL-003 on radiation-induced salivary gland damage in mice
Source: PubMed Central journal article supplement (PMC9120142; doi:10.1038/s41598-022-12581-y), 2022-05-19
Supplement: 41598_2022_12581_MOESM1_ESM.pdf [file 41598_2022_12581_MOESM1_ESM.pdf]

# Radioprotective effects and mechanism of HL-003 on radiation-induced salivary gland damage in mice

Jingming Ren,<sup>1</sup> Rong Huang,<sup>2,3</sup> Yanjie Li,<sup>2,3</sup> Ruiyang Chen,<sup>2,3</sup> Hongqi Tian,<sup>1,4,\*</sup> and Chenlu Liu<sup>2,3,\*</sup>

1 Tianjin Key Laboratory of Radiation Medicine and Molecular Nuclear Medicine, Institute of Radiation Medicine, Peking Union Medical College and Chinese Academy of Medical Science, Tianjin, 300192, China.

2 Department of Oral Medicine, Tianjin Stomatological Hospital, School of Medicine, Nankai University, Tianjin 300041, China.

3 Tianjin Key Laboratory of Oral and Maxillofacial Function Reconstruction, Tianjin 300041, China.

4 KeChow Pharma, Inc., 201203, Shanghai, China.

## Supplementary Materials

Supplementary table 1: The changes of weight in mice (g).<sup>a</sup>

|                 | Day-2      | Day0       | Day3       | Day5       | Day7       | Day9       | Day12      |
|-----------------|------------|------------|------------|------------|------------|------------|------------|
| control         | 23.00±0.75 | 22.90±0.94 | 22.77±0.90 | 22.55±0.05 | 23.05±1.21 | 23.20±0.33 | 23.10±1.02 |
| IR              | 22.60±1.29 | 23.14±1.15 | 22.94±0.98 | 22.57±1.53 | 23.65±1.34 | 23.68±1.38 | 23.76±1.44 |
| IR + HL-003     | 22.60±0.89 | 23.00±0.97 | 21.63±0.87 | 22.66±1.07 | 23.24±1.21 | 23.74±1.11 | 23.67±1.19 |
| IR + Amifostine | 22.53±1.09 | 23.01±0.82 | 22.57±1.02 | 22.95±1.12 | 23.88±1.18 | 23.93±1.10 | 24.35±0.84 |

<sup>a</sup>The data are represented as the mean ± SEM (n=6).

Supplementary table 2: The changes of water intake in mice (mL/d/mice).<sup>a</sup>

|                 | Day-2     | Day0      | Day3      | Day5      | Day7      | Day9      | Day12     |
|-----------------|-----------|-----------|-----------|-----------|-----------|-----------|-----------|
| control         | 4.16±0.93 | 4.58±0.24 | 4.58±0.61 | 4.38±0.67 | 5.00±0.17 | 6.16±0.78 | 6.75±0.25 |
| IR              | 4.00±0.46 | 4.16±0.44 | 4.75±0.27 | 5.08±0.19 | 5.33±0.45 | 6.25±0.22 | 6.67±0.67 |
| IR + HL-003     | 4.28±0.33 | 4.42±0.83 | 4.64±0.11 | 5.07±0.53 | 6.00±0.67 | 5.86±0.49 | 6.85±0.55 |
| IR + Amifostine | 4.33±0.17 | 4.83±0.10 | 5.00±0.31 | 5.32±0.38 | 5.33±0.33 | 5.92±0.63 | 6.67±0.82 |

<sup>a</sup>The data are represented as the mean ± SEM (n=6).

Supplementary table 3: The changes of food intake in mice (g/d/mice).<sup>a</sup>

|                 | Day-2     | Day0      | Day3      | Day5      | Day7      | Day9      | Day12     |
|-----------------|-----------|-----------|-----------|-----------|-----------|-----------|-----------|
| control         | 3.03±0.23 | 3.26±0.67 | 4.18±0.32 | 3.26±0.61 | 4.25±0.17 | 4.12±0.18 | 3.45±0.03 |
| IR              | 2.38±0.05 | 3.30±0.15 | 3.35±0.78 | 4.79±0.17 | 4.42±0.79 | 3.00±0.38 | 3.70±0.84 |
| IR + HL-003     | 3.82±0.42 | 3.41±0.42 | 3.80±0.12 | 4.42±0.92 | 4.83±0.28 | 3.10±0.29 | 3.01±0.47 |
| IR + Amifostine | 3.08±0.33 | 3.77±0.67 | 4.06±0.33 | 3.62±0.08 | 4.36±0.25 | 2.93±0.53 | 3.68±0.18 |

<sup>a</sup>The data are represented as the mean ± SEM (n=6).

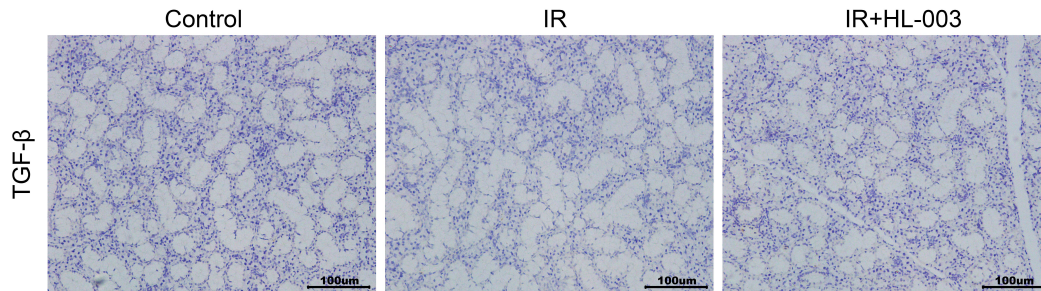

**Supplementary figure 1.** HL-003 may not affect TGF-β in salivary gland tissue. Scale bars represent 50μm.

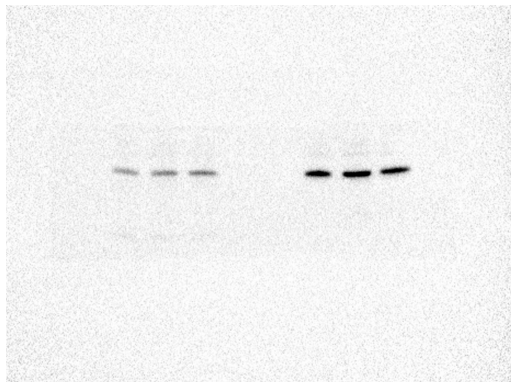

**Supplementary figure 2.** Western blot analysis of Bax.

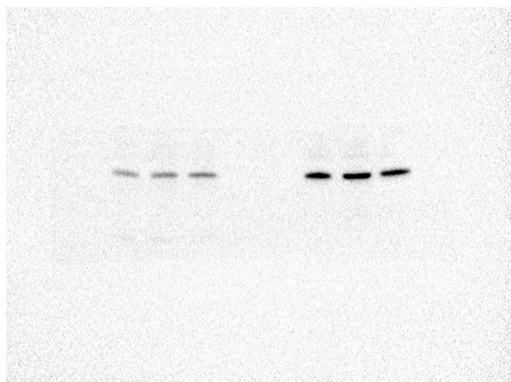

**Supplementary figure 3.** Western blot analysis of Bax.

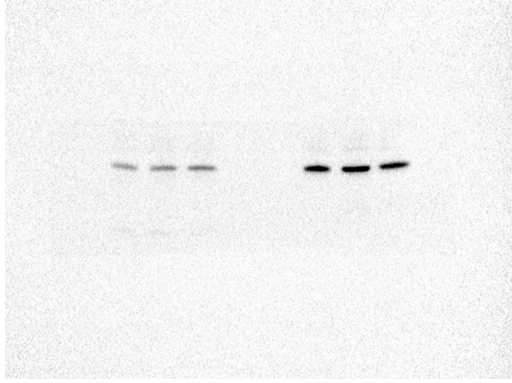

**Supplementary figure 4.** Western blot analysis of Bax.

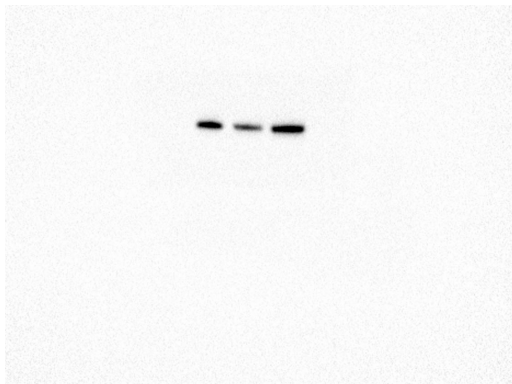

**Supplementary figure 5.** Western blot analysis of Bcl-2.

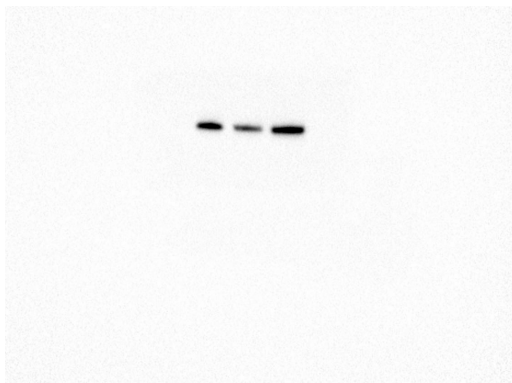

**Supplementary figure 6.** Western blot analysis of Bcl-2.

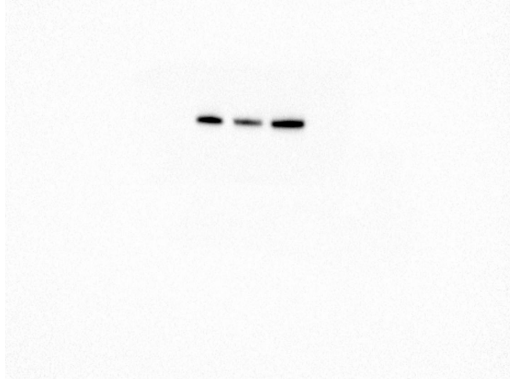

**Supplementary figure 7.** Western blot analysis of Bcl-2.

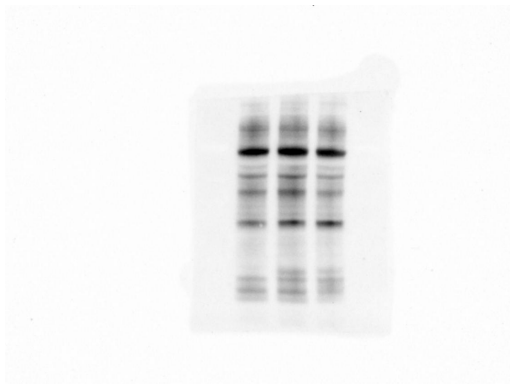

**Supplementary figure 8.** Western blot analysis of caspase-3.

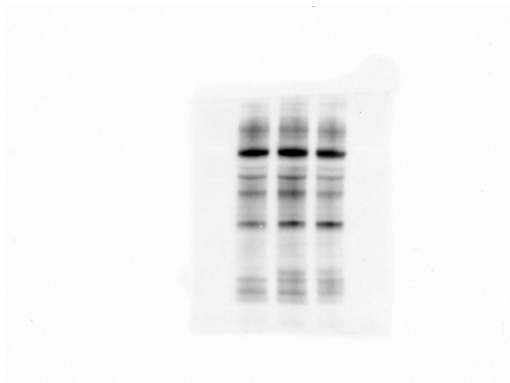

**Supplementary figure 9.** Western blot analysis of caspase-3.

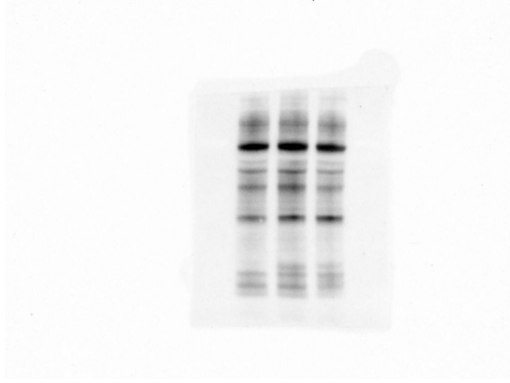

**Supplementary figure 10.** Western blot analysis of caspase-3.

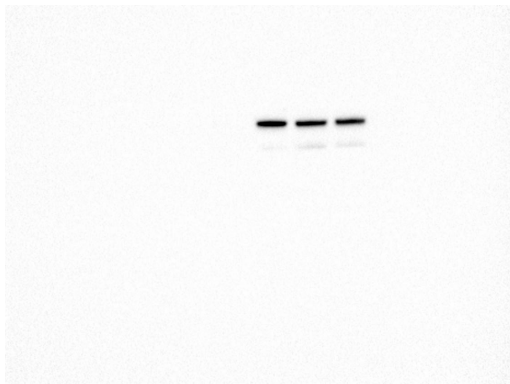

**Supplementary figure 11.** Western blot analysis of GAPDH.

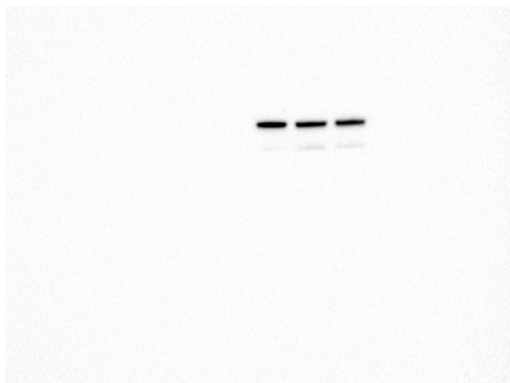

**Supplementary figure 12.** Western blot analysis of GAPDH.

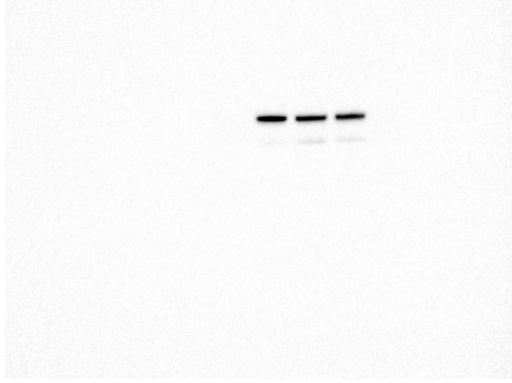

**Supplementary figure 13.** Western blot analysis of GAPDH.

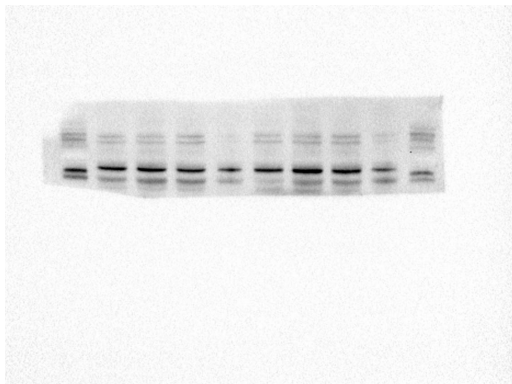

**Supplementary figure 14.** Western blot analysis of NOX4.

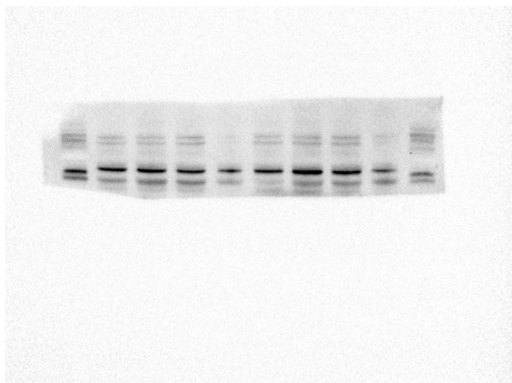

**Supplementary figure 15.** Western blot analysis of NOX4.

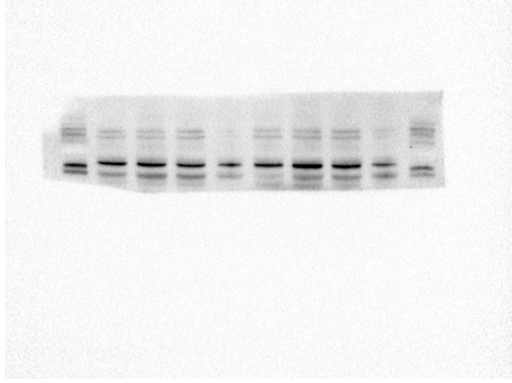

**Supplementary figure 16.** Western blot analysis of NOX4.

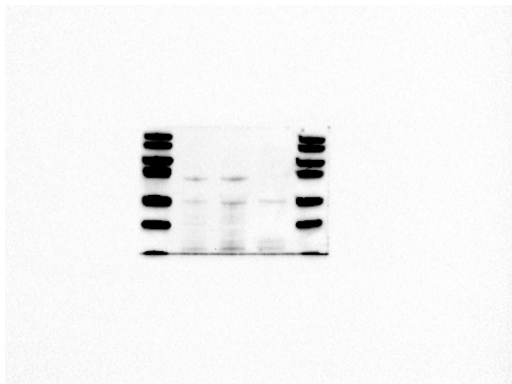

**Supplementary figure 17.** Western blot analysis of p-p53.

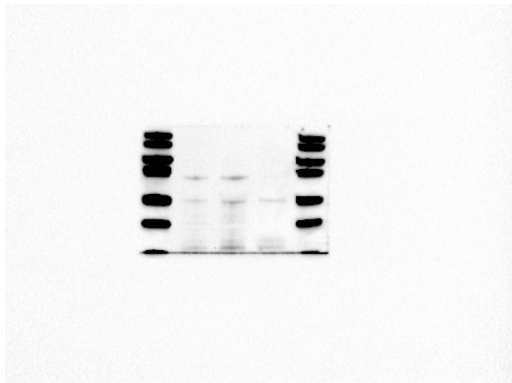

**Supplementary figure 18.** Western blot analysis of p-p53.

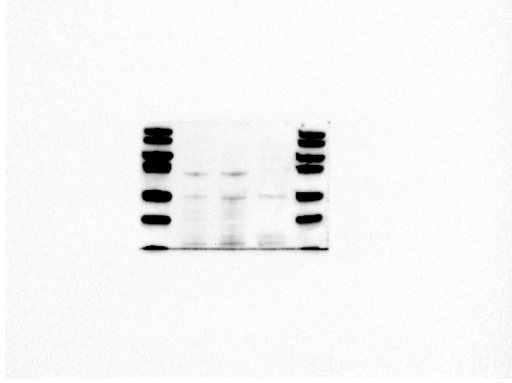

**Supplementary figure 19.** Western blot analysis of p-p53.
